# Supplementary material
Source: Springer Nature journal article supplement (https://www.springermedizin.de/resource/supplementary/12935_2009_240_MOESM6_ESM.pdf/9540224)

G292

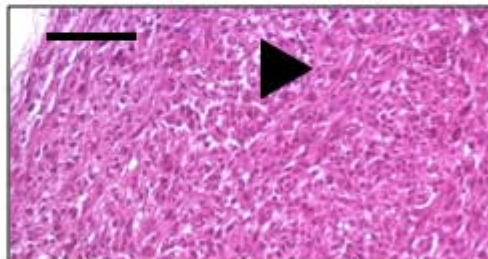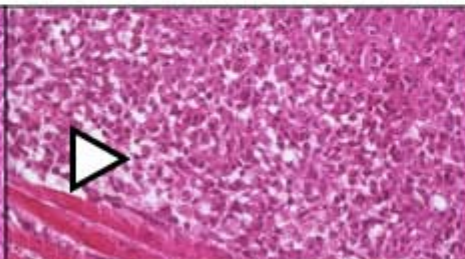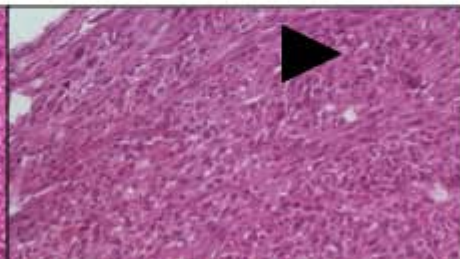

PC3

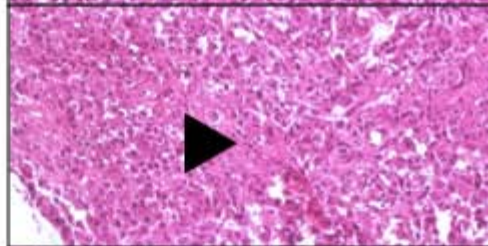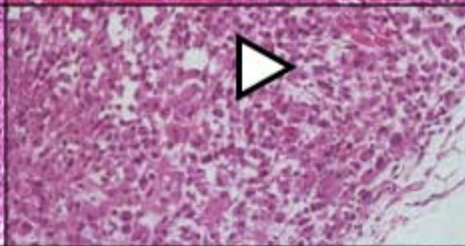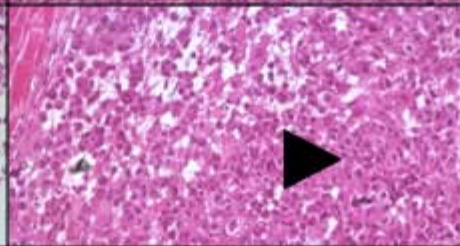

MDA-  
MB231

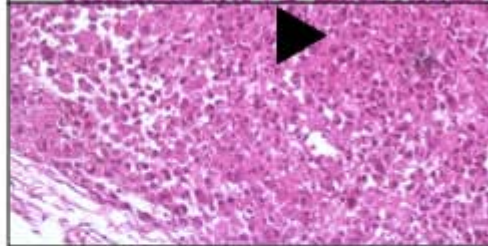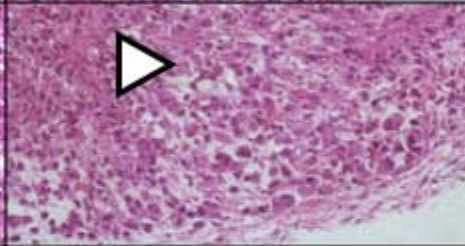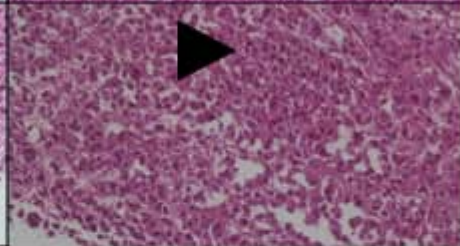

Cells

Dz13

Scr

Supplement: MOESM6 [file 9540224]
